# Supplementary material for: Dynamics of Connexin 43 Down Modulation in Human Articular Chondrocytes Stimulated by Tumor Necrosis Factor Alpha
Source: MDPI journal article supplement (doi:10.3390/ijms23105575), 2022-05-16
Supplement: s1 [file s1]

## Supplementary figure legends

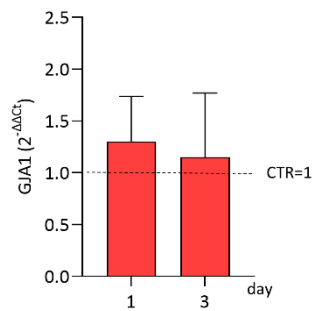

**Supplementary Figure S1.** Gene expression of GJA1 in TNF $\alpha$ -stimulated CH at day 1 and 3 analyzed by real-time PCR. Data ( $n$  gene expression of GJA1) are expressed as  $2^{-\Delta\Delta C_t}$  (TBP was used as a housekeeping gene).

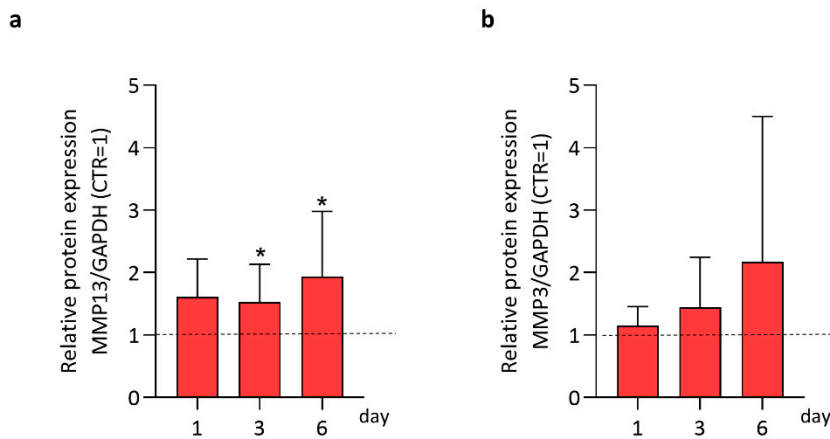

**Supplementary Figure S2.** Effect of TNF $\alpha$  on MMPs protein expression in CH. Quantification of the expression of MMP13 (above) and MMP3 (below) in TNF $\alpha$ -stimulated CH at day 1, 3 and 6 analyzed by Western blot. Data ( $n$  Effect of TNF $\alpha$  on MMPs protein expression in CH. PDH and expressed as relative values (CTR = 1). Statistical analysis was performed by paired  $t$ -test. Significance vs. appropriate CTR for each time point are shown as \*  $p < 0.05$ .

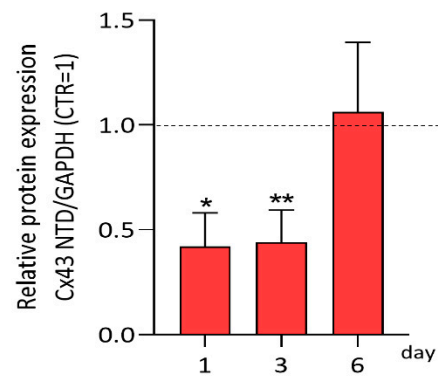

**Supplementary Figure S3.** Western blot analysis of the expression of Cx43 using an Ab raised against an epitope at the NTD in TNF $\alpha$ -stimulated CH at day 1, 3 and 6. Data (*n* Western blot analysis of the expression of Cx43 using an Ab raised against an epitope at the NTD in TNF $\alpha$ -stimulat. CTR is shown as \*  $p < 0.05$  and \*\*  $p < 0.01$ .

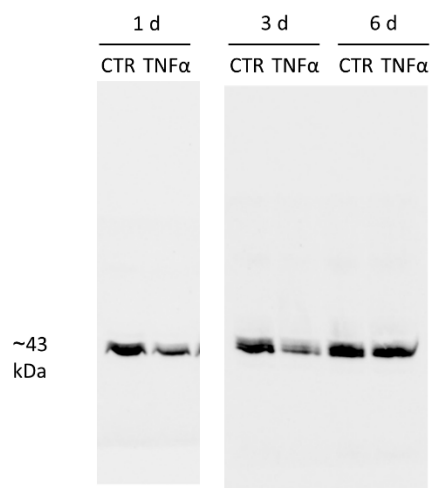

**Supplementary Figure S4.** Full Western blot image of Figure 1b. Cx43 expression was detected by an antibody raised against CTD.

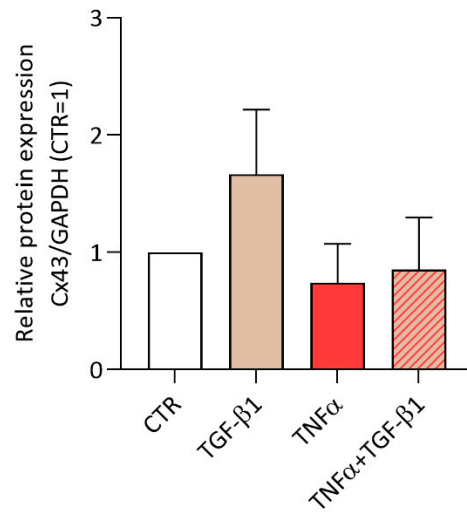

**Supplementary Figure S5.** Quantification of the expression of Cx43 in CH treated with TNF $\alpha$  or/and TGF $\beta$  at day 6 analyzed by Western blot. Data ( $n = 6$  independent experiments) were normalized on GAPDH and expressed as relative values (CTR = 1).

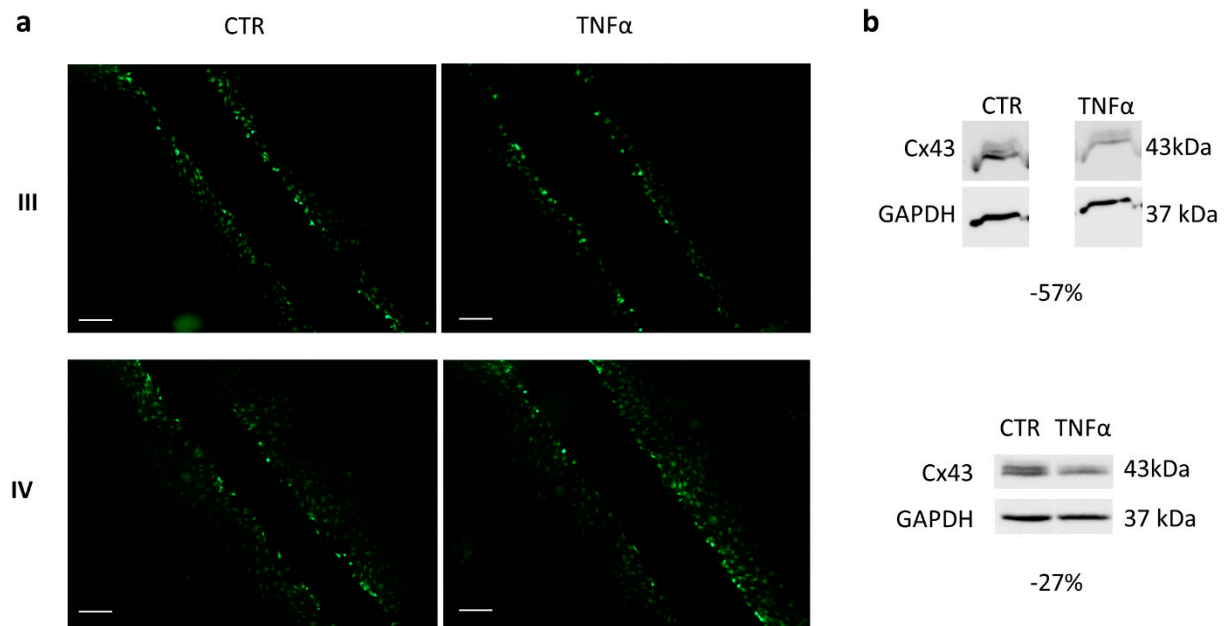

**Supplementary Figure S6.** (a) Illustrative images of scrape loading/dye transfer (SL/DT) assay in CTR (**on the left**) and TNF $\alpha$ -treated (**on the right**) CH, at day 3. Scale bars: 200  $\mu$ m. (b) Immunoblot of each experiment is reported. The percentage of decrease in Cx43 protein expression in TNF $\alpha$ -treated CH compared to CTR is shown.

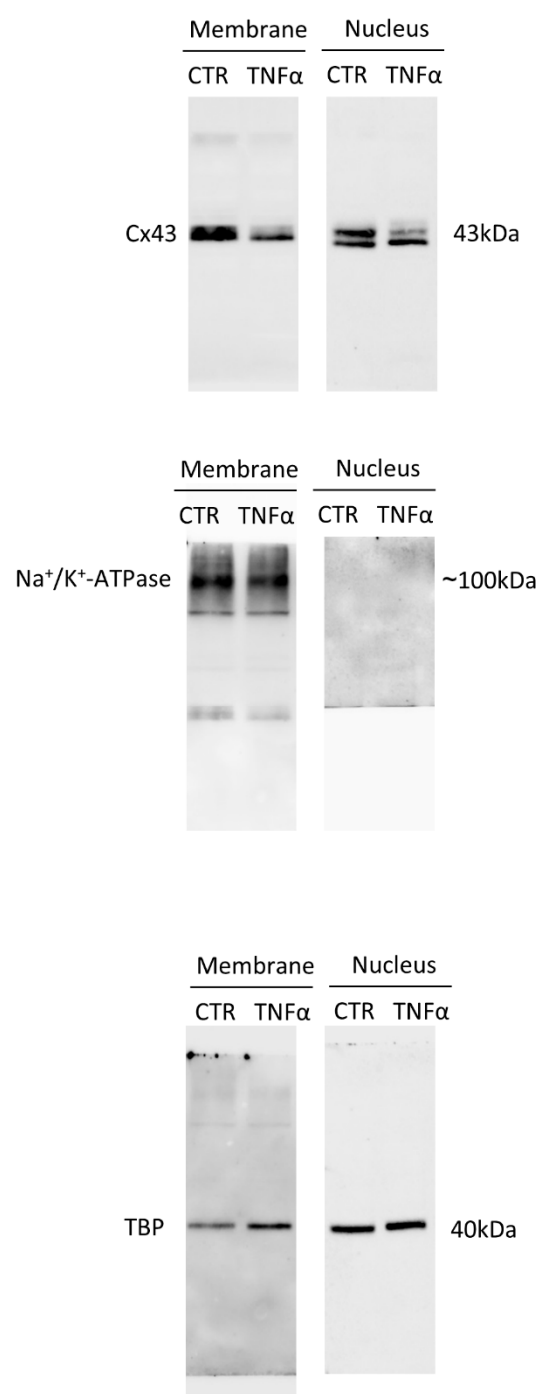

**Supplementary Figure S7.** Full Western blot image of Figure 5b.
