# Supplementary material for: Dynamics of Connexin 43 Down Modulation in Human Articular Chondrocytes Stimulated by Tumor Necrosis Factor Alpha
Source: Int J Mol Sci. 2022 May 16;23(10):5575. doi: 10.3390/ijms23105575 (PMC9142923; doi:10.3390/ijms23105575)
Supplement: Supplementary file 1 [file ijms-23-05575-s001.zip › Supplementary Tables S1-S3.xlsx]

## Sheet: Supplementary Table S1
Supplementary Table S1. List of the 28 proteins identified in the TNFα sample only (around 25 KDalton)
Protein IDs	Protein Names	Gene Names
P61086	Ubiquitin-conjugating enzyme E2 K	UBE2K
P16455	Methylated-DNA--protein-cysteine methyltransferase	MGMT
P28070	Proteasome subunit beta type-4	PSMB4
P61006	Ras-related protein Rab-8A	RAB8A
O75832	26S proteasome non-ATPase regulatory subunit 10	PSMD10
P47985	Cytochrome b-c1 complex subunit Rieske, mitochondrial	UQCRFS1
P60900	Proteasome subunit alpha type-6	PSMA6
Q92520	Protein FAM3C	FAM3C
Q92930	Ras-related protein Rab-8B	RAB8B
Q96BX8	MOB kinase activator 3A	MOB3A
Q96C19	EF-hand domain-containing protein D2	EFHD2
O43402	ER membrane protein complex subunit 8	EMC8
O75223	Gamma-glutamylcyclotransferase	GGCT
O75489	NADH dehydrogenase [ubiquinone] iron-sulfur protein 3, mitochondrial	NDUFS3
O95372	Acyl-protein thioesterase 2	LYPLA2
P07305	Histone H1.0	H1-0
P19404	NADH dehydrogenase [ubiquinone] flavoprotein 2, mitochondrial	NDUFV2
P45973	Chromobox protein homolog 5	CBX5
P47914	60S ribosomal protein L29	RPL29
P50402	Emerin	EMD
P62826	GTP-binding nuclear protein Ran	RAN
P63104	14-3-3 protein zeta/delta	YWHAZ
Q8WW12	PEST proteolytic signal-containing nuclear protein	PCNP
Q99653	Calcineurin B homologous protein 1	CHP1
Q9BQ61	Telomerase RNA component interacting RNase	TRIR
Q9H0E2	Toll-interacting protein	TOLLIP
Q9Y3B8-3	Isoform 3 of Oligoribonuclease, mitochondrial	REXO2
Q9Y696	Chloride intracellular channel protein 4	CLIC4

## Sheet: Supplementary Table S2
Supplementary Table S2. Functional enrichment. Biological processes (top three results considering FDR).
#term ID	term description	observed gene count	background gene count	strength	false discovery rate	matching proteins in your network (IDs)	matching proteins in your network (labels)
GO:0009057	Macromolecule catabolic process	11	1058	0.86	0.0014	9606.ENSP00000217958,9606.ENSP00000242784,9606.ENSP00000261427,9606.ENSP00000261479,9606.ENSP00000265260,9606.ENSP00000290541,9606.ENSP00000314733,9606.ENSP00000335632,9606.ENSP00000344504,9606.ENSP00000363638,9606.ENSP00000418868	PSMD10,C19orf43,UBE2K,PSMA6,PCNP,PSMB4,TOLLIP,CHP1,H1F0,LYPLA2,RPL29
GO:0044248	Cellular catabolic process	12	1758	0.68	0.0141	9606.ENSP00000217958,9606.ENSP00000242784,9606.ENSP00000261427,9606.ENSP00000261479,9606.ENSP00000265260,9606.ENSP00000290541,9606.ENSP00000300935,9606.ENSP00000314733,9606.ENSP00000335632,9606.ENSP00000344504,9606.ENSP00000363638,9606.ENSP00000418868	PSMD10,C19orf43,UBE2K,PSMA6,PCNP,PSMB4,RAB8A,TOLLIP,CHP1,H1F0,LYPLA2,RPL29
GO:0044265	Cellular macromolecule catabolic process	9	917	0.84	0.0148	9606.ENSP00000217958,9606.ENSP00000242784,9606.ENSP00000261427,9606.ENSP00000261479,9606.ENSP00000265260,9606.ENSP00000290541,9606.ENSP00000314733,9606.ENSP00000344504,9606.ENSP00000418868	PSMD10,C19orf43,UBE2K,PSMA6,PCNP,PSMB4,TOLLIP,H1F0,RPL29

## Sheet: Supplmentary Table S3
Supplementary Table S3. Ten measurements of the distance (µm) crossed by Lucifer yellow from the scrape line in 4 CH populations (I–IV, CTR and TNFα-treated, for 3 days). Percentage decreases were calculated for Lucifer yellow assay and for Cx43 protein expression in every population.
		I		II		III		IV
		CTR	TNFα	CTR	TNFα	CTR	TNFα	CTR	TNFα
	Distance (μm) from the scrape line	211.321	84.119	114.576	289.984	169.222	87.727	115.378	167.726
		193.726	66.483	264.847	228.1	109.57	62.61	187.883	153.844
		193.329	36.056	342.176	230.8	134.164	84.095	157.848	180.942
		143.822	22.361	269.352	138.822	158.789	83.57	161.901	147.58
		193.196	34.176	190.286	187.494	147.648	59.933	155.048	134.462
		194.385	34.986	208	221.933	70.317	152.118	114.49	98.489
		128.718	60.926	214.782	214.663	187.802	67.082	162.825	154.777
		186.59	65.391	212.192	210.447	160.943	70.456	164.584	105.679
		193.726	46.519	256.739	247.726	172.079	85.604	139.556	143.122
		190.339	48.332	208.958	167.779	212.426	70.682	136.85	98.184
	mean	182.915	49.9349	228.191	213.775	152.296	82.3877	149.636	138.481
	SD	25.6484	18.9768	60.0037	42.1086	40.232	26.488	23.049	29.02
	Lucifer yellow dye transfer		-0.727005		-0.0631752		-0.459029		-0.0745528
	Cx43 protein expression		-0.85		-0.34		-0.57		-0.27
